# Supplementary material for: Kinetic and mechanistic investigations of the degradation of propranolol in heat activated persulfate process
Source: Royal Society of Chemistry journal article supplement (doi:10.1039/c8ra08488b), 2018-01-01
Supplement: c8ra08488b1.pdf [file c8ra08488b1.pdf]

**Supplementary Information**

**for**

**Kinetic and mechanistic investigations of the degradation of propranolol in heat  
activated persulfate process**

Yu-qiong Gao<sup>\*a</sup>, Jia-nan Fang<sup>a</sup>, Nai-yun Gao<sup>b</sup>, Xue-nong Yi<sup>\*a</sup>, Wei Mao<sup>c</sup>, Jia Zhang<sup>a</sup>

<sup>a</sup>School of Environment and Architecture, University of Shanghai for Science and Technology,  
Shanghai 200093, China.

<sup>b</sup>College of Environmental Science and Engineering, Tongji University, Shanghai 200092, China

<sup>c</sup>Academy of Military Sciences PLA China, Beijing 100036, China

\*Corresponding authors Email address: [gaoyq@usst.edu.cn](mailto:gaoyq@usst.edu.cn) (Yu-qiong Gao);

[waterpurify\\_usst@outlook.com](mailto:waterpurify_usst@outlook.com) (Xue-nong Yi)

E-mail address:

Tel.: +86 21 55275979

**Table S1.** Main water quality characteristics of raw water

| Samples         | DOC<br>(mg/L) | Cl <sup>-</sup><br>(mg/L) | HCO <sub>3</sub> <sup>-</sup><br>(mg/L) | pH   | UV <sub>254</sub><br>(cm <sup>-1</sup> ) |
|-----------------|---------------|---------------------------|-----------------------------------------|------|------------------------------------------|
| Yangtze River   | 3.216         | 68                        | 131                                     | 7.95 | 0.117                                    |
| Jinze Reservoir | 4.296         | 57                        | 119                                     | 8.00 | 0.077                                    |

**Table S2.** Degradation products and their possible structures identified by LC/MS/MS

| Compounds | m/z | Tentative structure                                                                  |
|-----------|-----|--------------------------------------------------------------------------------------|
| PRO       | 260 | 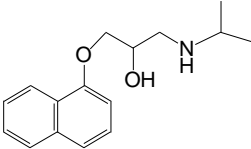   |
| DP1       | 134 |    |
| DP2       | 276 |    |
| DP3       | 292 |   |
| DP4       | 310 |  |
| DP5       | 274 |  |
| DP6       | 308 |  |
| DP7       | 282 |  |

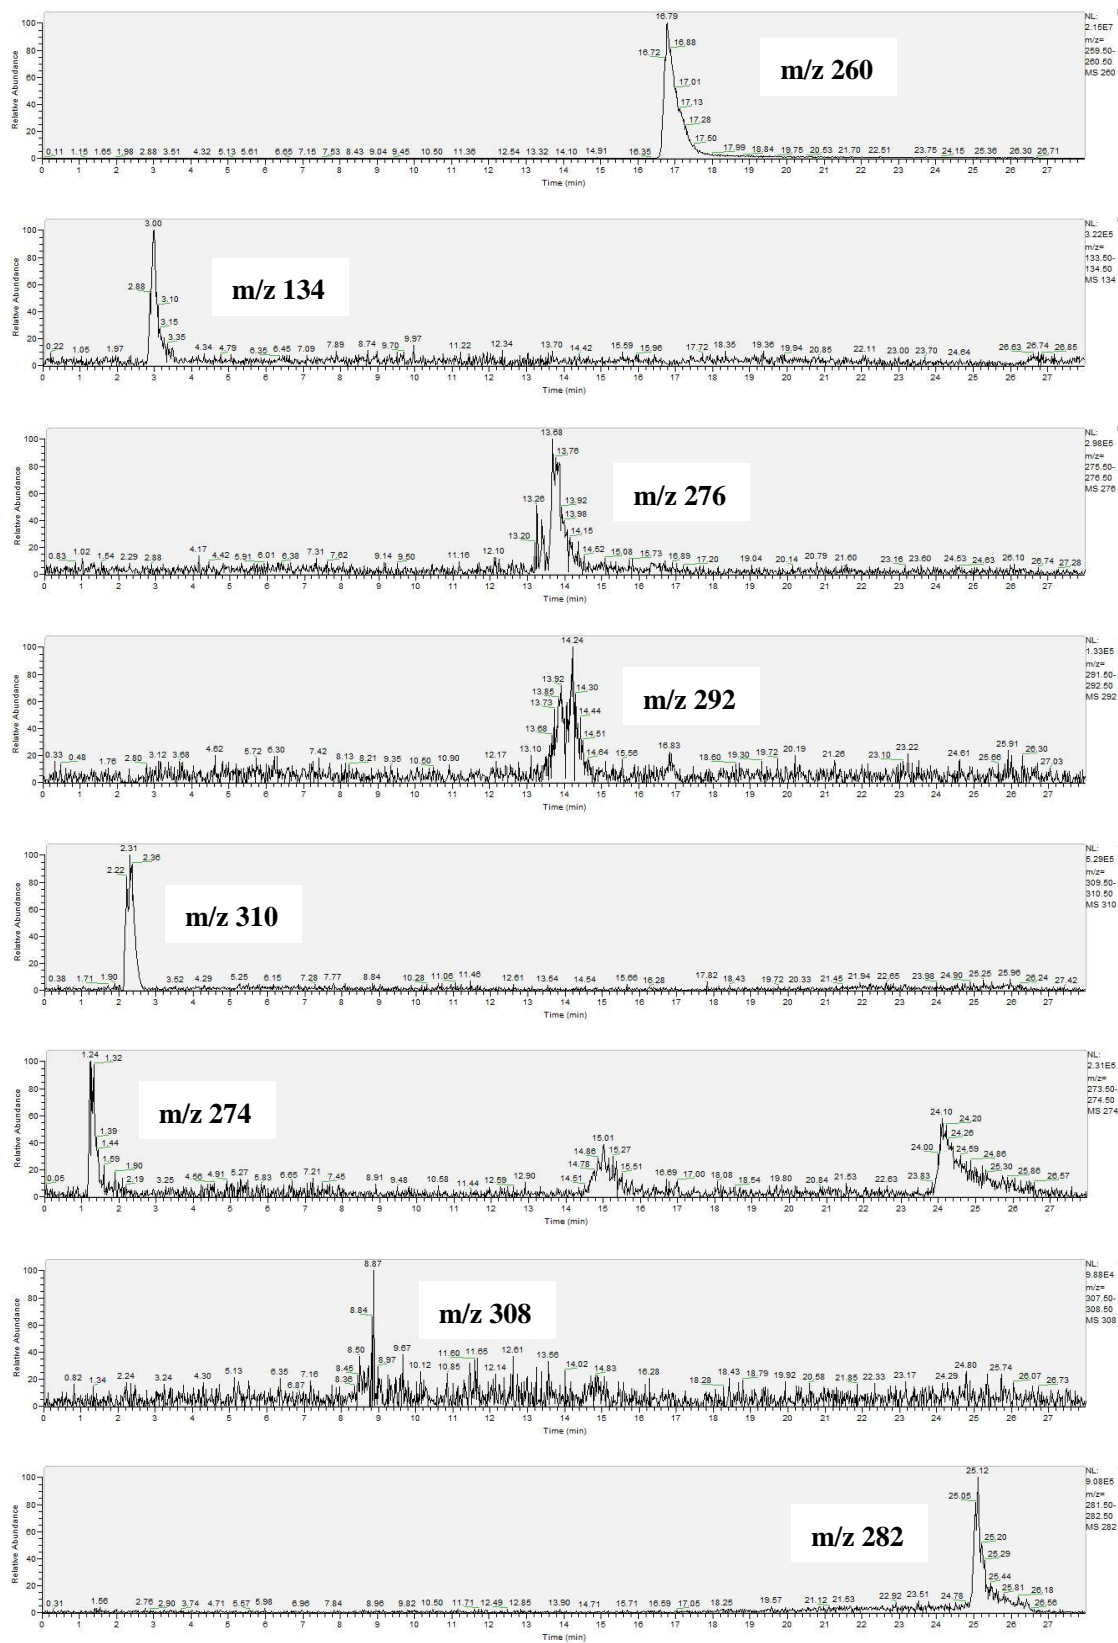

Fig. S1. LC/MS chromatogram of PRO and its degradation products.

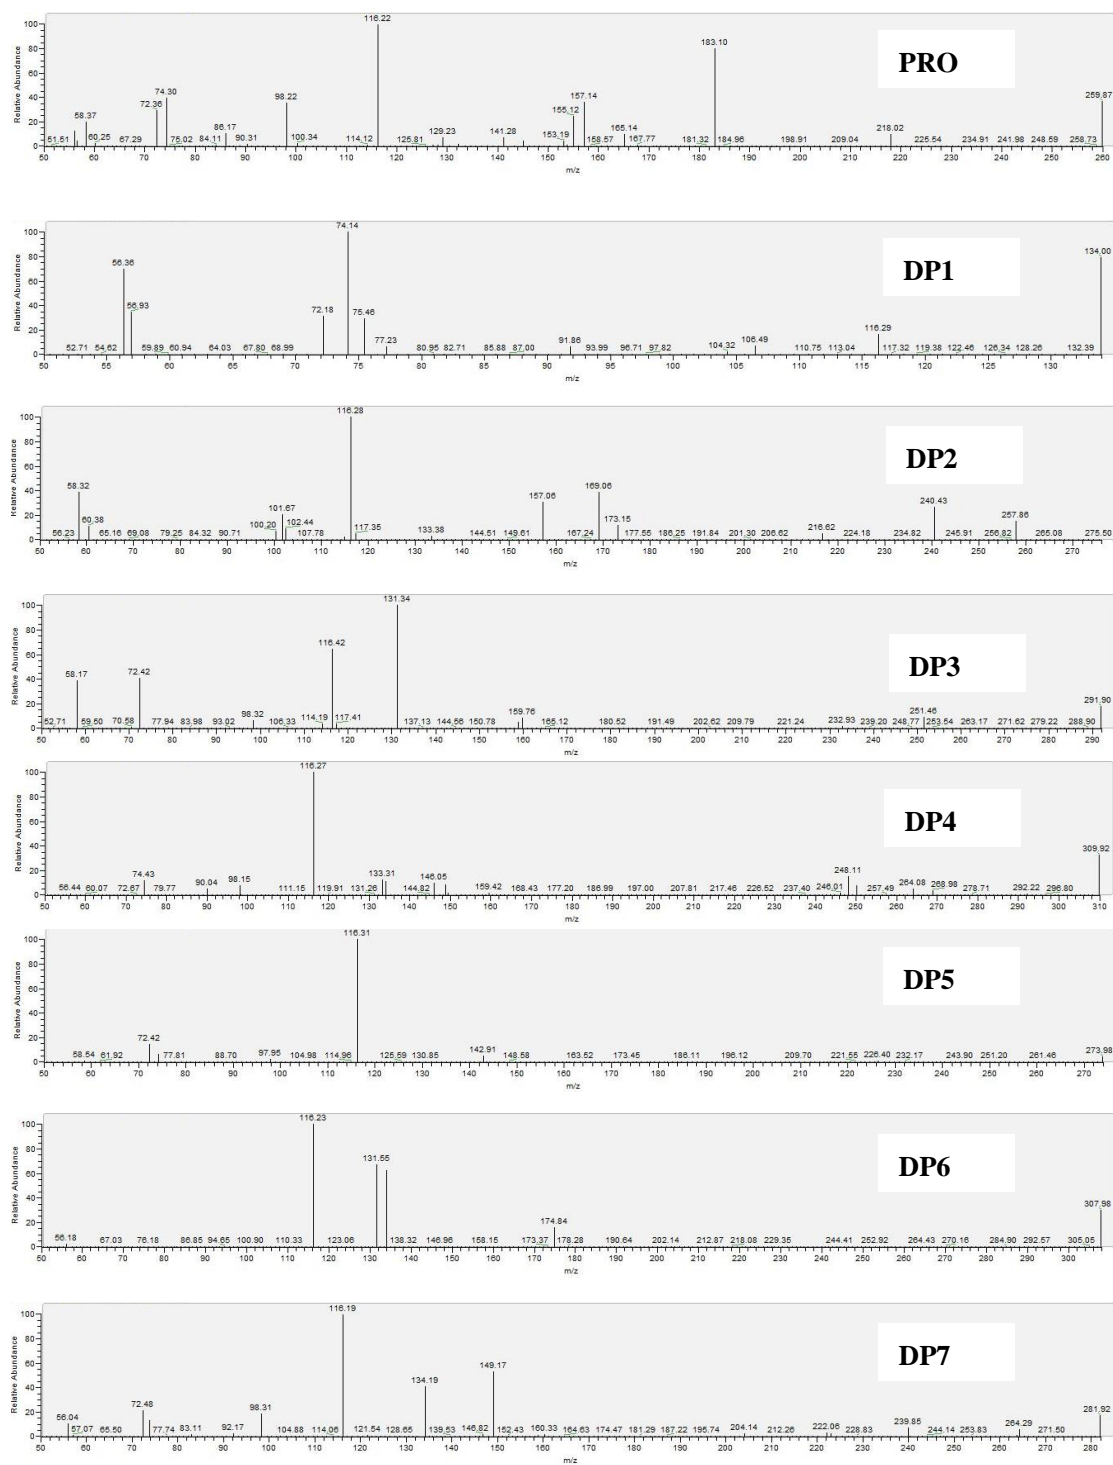

Fig. S2. MS/MS spectra of PRO and its degradation products.
